# Supplementary material for: Estimating the Impact of Influenza Vaccination on Acute and ICU Hospital Bed Usage in an Influenza Season under Endemic COVID-19 in the US
Source: MDPI journal article supplement (doi:10.3390/vaccines10111908), 2022-11-11
Supplement: s1 [file s1]

## Supplementary Materials

### Mathematical Equations for the Dynamic Model

#### Differential Equations

|                                                                                                                                                                                                                                                                                                                                                                                                                           |                                                                                                                                                                                                                                                                                                                                                                                                                           |
|---------------------------------------------------------------------------------------------------------------------------------------------------------------------------------------------------------------------------------------------------------------------------------------------------------------------------------------------------------------------------------------------------------------------------|---------------------------------------------------------------------------------------------------------------------------------------------------------------------------------------------------------------------------------------------------------------------------------------------------------------------------------------------------------------------------------------------------------------------------|
| $S_{t+1,i}^N = S_{t,i}^N - \lambda_{t,i} S_{t,i}^N$ $E_{t+1,i}^{1N} = E_{t,i}^{1N} + \lambda_{t,i} S_{t,i}^N - \gamma_1 E_{t,i}^{1N}$ $E_{t+1,i}^{2N} = E_{t,i}^{2N} + \gamma_1 (E_{t,i}^{1N} - E_{t,i}^{2N})$ $I_{t+1,i}^{1N} = I_{t,i}^{1N} + \gamma_1 E_{t,i}^{2N} - \gamma_2 I_{t,i}^{1N}$ $I_{t+1,i}^{2N} = I_{t,i}^{2N} + \gamma_2 (I_{t,i}^{1N} - I_{t,i}^{2N})$ $R_{t+1,i}^N = R_{t,i}^N + \gamma_2 I_{t,i}^{2N}$ | $S_{t+1,i}^V = S_{t,i}^V - \lambda_{t,i} S_{t,i}^V$ $E_{t+1,i}^{1V} = E_{t,i}^{1V} + \lambda_{t,i} S_{t,i}^V - \gamma_1 E_{t,i}^{1V}$ $E_{t+1,i}^{2V} = E_{t,i}^{2V} + \gamma_1 (E_{t,i}^{1V} - E_{t,i}^{2V})$ $I_{t+1,i}^{1V} = I_{t,i}^{1V} + \gamma_1 E_{t,i}^{2V} - \gamma_2 I_{t,i}^{1V}$ $I_{t+1,i}^{2V} = I_{t,i}^{2V} + \gamma_2 (I_{t,i}^{1V} - I_{t,i}^{2V})$ $R_{t+1,i}^V = R_{t,i}^V + \gamma_2 I_{t,i}^{2V}$ |
| <p>For t=0,</p> <p><math>S_{0,i}^N</math> = Initial number of susceptibles</p> <p><math>I_{0,i}^{1N}</math> = Initial number of infectious individuals</p> $E_{0,i}^{1N} = E_{0,i}^{2N} = I_{0,i}^{2N} = R_{0,i}^N = 0$                                                                                                                                                                                                   | <p>For t=0,</p> $S_{0,i}^V = E_{0,i}^{1V} = E_{0,i}^{2V} = I_{0,i}^{1V} = I_{0,i}^{2V} = R_{0,i}^V = 0$                                                                                                                                                                                                                                                                                                                   |

where

$S^N$  and  $S^V$  represent the number of susceptibles of age group  $i$  history. The susceptibles indexed by N are naive and the ones indexed by V have received the vaccine.

$E_i^{1X}$  and  $E_i^{2X}$  represent exposed, but not yet infectious individuals with vaccine history X.

$I_i^{1X}$  and  $I_i^{2X}$  represent infectious individuals with vaccine history X.

$R_i^X$  represent immune individuals of age class  $i$  with vaccine history X

$\alpha_i$  is the proportion of the vaccinees become protected (we assume full protection), while the rest  $1 - \alpha_i$  remain fully susceptible. The vaccine efficacy  $\alpha_i$  depends on age group.

$\gamma_1, \gamma_2$  represent the rate of loss of latency ( $\gamma_1$ ) and infectiousness ( $\gamma_2$ ) in both groups. Hence, the average latent period is  $2/\gamma_1$ , and the average infectious period is  $2/\gamma_2$

## Force of Infection

$$\lambda_{t,i}^* = q\sigma_i \sum_{j=0}^{100} \sum_{x=\{N,V\}} c_{ij} \left( \frac{I_{t,j}^{1X} + I_{t,j}^{2X}}{N_j} \right)$$

$\lambda_{t,i}^*$  is the age-group specific force of infection

$q$  is the transmissibility parameter,

$\sigma_i$  is the susceptibility of age group  $i$

$c_{ij}$  is the rate at which individuals in age group  $i$  make contact with those in age group  $j$

$I_i^{1X}$  and  $I_i^{2X}$  represent infectious individuals with vaccine history  $X$ .

$N_j$  is the total number of people in age group  $j$

**Figure S1. Transmission model and outcome module**

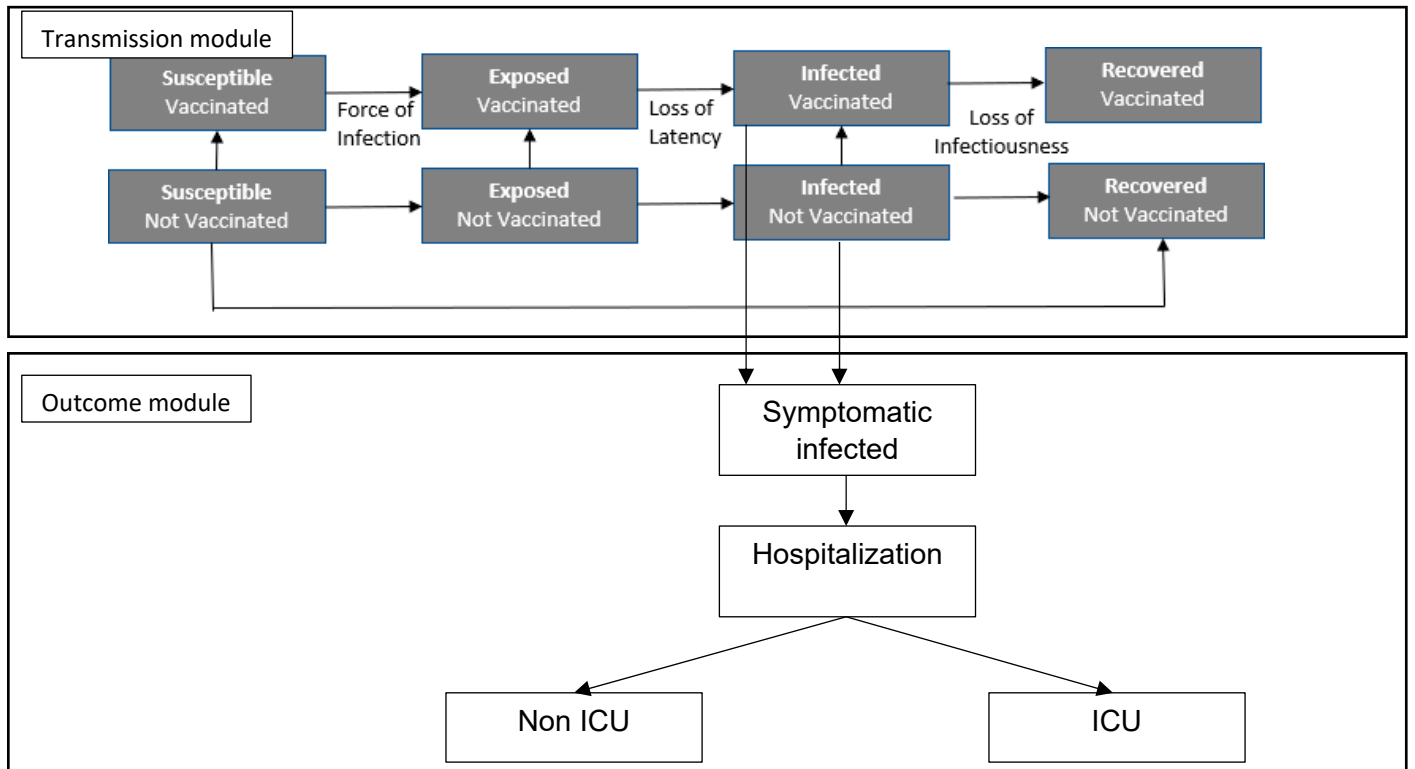

**Figure S2. Hospital bed occupancy over time for the base case scenario (QIVe for all age groups) where peak COVID-19 and influenza bed occupancy coincide. Data are based on (a) alpha, (b), delta, and (c) omicron COVID-19 variants**

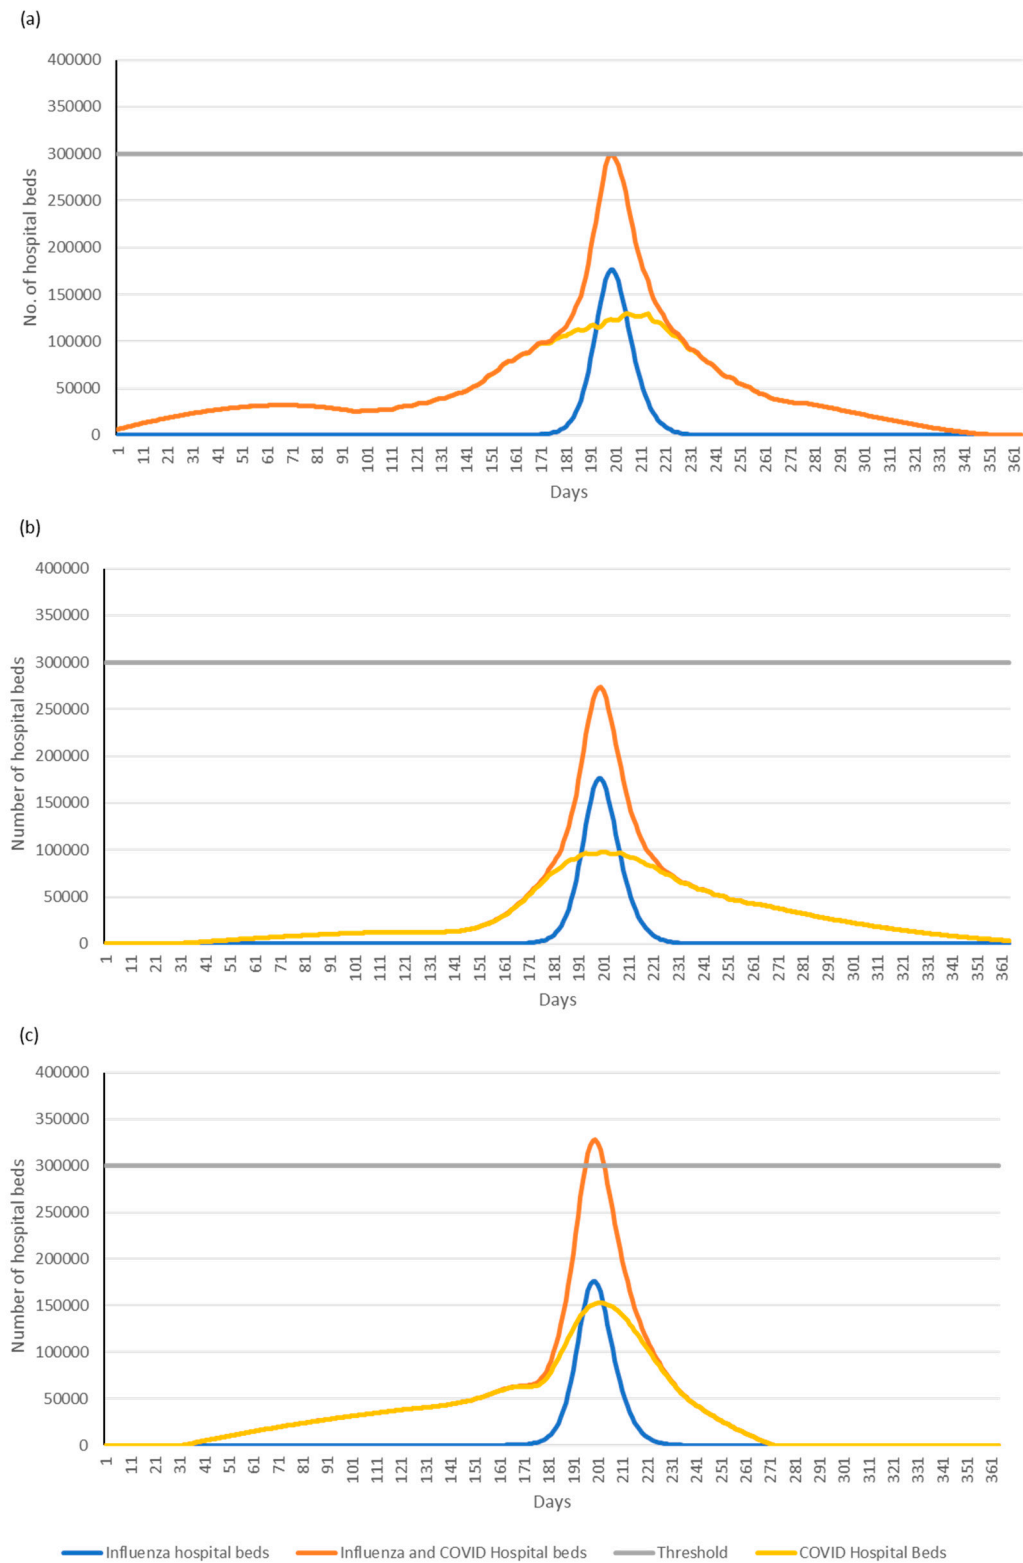

**Figure S3. ICU bed occupancy over time for the base case scenario (QIVe for all age groups) where peak COVID-19 and influenza bed occupancy coincide. Data are based on (a) alpha, (b), delta, and (c) omicron COVID-19 variants**

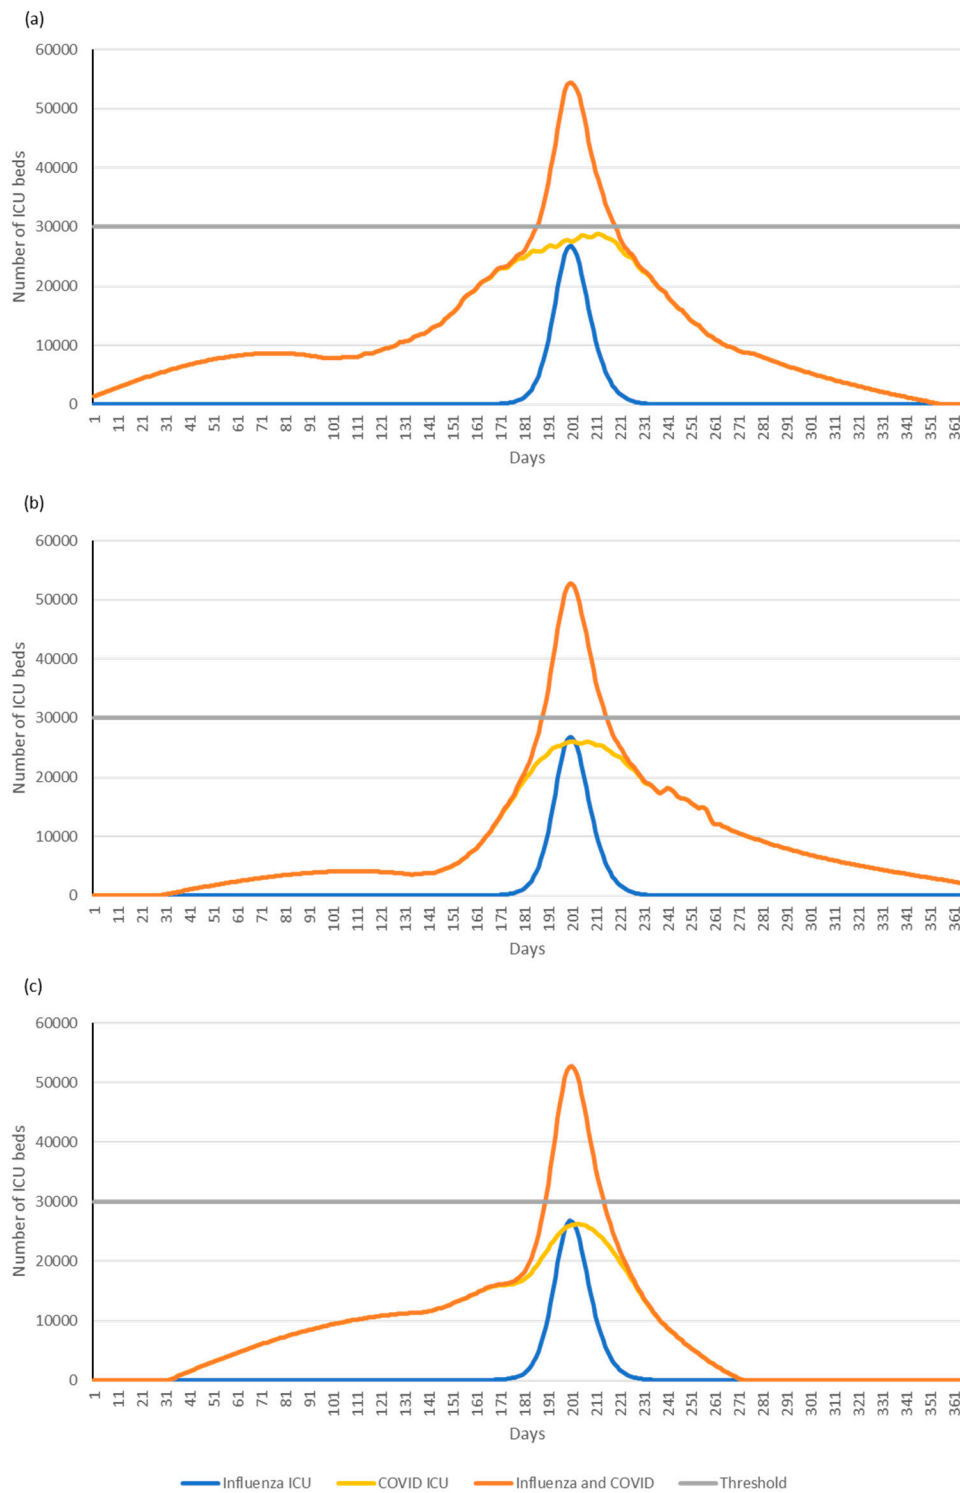

**Table S1.** Vaccine effectiveness assumptions by age group and vaccine type

| Age group          | QIVe [1] | QIVc [2] | aQIV [3] |
|--------------------|----------|----------|----------|
| 6months to 4 years | 42%      | 46%      | –        |
| 5 to 17 years      | 42%      | 46%      | –        |
| 18 to 49 years     | 42%      | 46%      | –        |
| 50 to 64 years     | 42%      | 46%      | –        |
| 65 to 74 years     | 42%      | 42%      | 53%      |
| ≥75 years          | 42%      | 42%      | 53%      |

QIVc, cell-based quadrivalent influenza vaccine; QIVe, egg-based quadrivalent influenza vaccine; aQIV, adjuvanted quadrivalent influenza vaccine

**Table S2.** Calibration parameters for the dynamic model of influenza transmission

| Parameter                                                                      | Low incidence | High incidence |
|--------------------------------------------------------------------------------|---------------|----------------|
| $R_0$                                                                          | 2.46          | 3.04           |
| $R_{eff}(t=0)$                                                                 | 1.80          | 2.22           |
| Pre-acquired immunity*                                                         | 27%           | 27%            |
| Latency period, days <sup>†</sup>                                              | 0.8           | 0.8            |
| Infectious period, days <sup>†</sup>                                           | 1.8           | 1.8            |
| Probability of transmission upon contact                                       |               |                |
| 6 months–4 years                                                               | 0.114         | 0.188          |
| 5–17 years                                                                     | 0.078         | 0.102          |
| 18–49 years                                                                    | 0.102         | 0.105          |
| 50–64 years                                                                    | 0.099         | 0.190          |
| 65–74 years                                                                    | 0.104         | 0.107          |
| ≥75 years                                                                      | 0.065         | 0.133          |
| Probability of hospitalization by age                                          |               |                |
| 6 months–4 years                                                               |               | 0.0141         |
| 5–17 years                                                                     |               | 0.0006         |
| 18–49 years                                                                    |               | 0.0042         |
| 50–64 years                                                                    |               | 0.0193         |
| ≥65 years                                                                      |               | 0.0421         |
| Probability of ICU hospitalization from influenza hospitalisation <sup>‡</sup> |               | 0.1%           |

\* Pre-acquired immunity was set to be consistent with estimates from Baguelin et al. 2013 [4]

<sup>†</sup>Estimate based on Ferguson et al. 2005 [5]

<sup>‡</sup>Estimate based on Beumer et al., 2018 and Lina et al., 2020 [6,7]

Transmission parameters were estimated for each age-group using the Bound Optimization BY Quadratic Approximation (BOBYQA) [8] algorithm for likelihood maximization as implemented NLOpt [9]. The number of observed influenza cases by age-group was assumed to follow a Poisson distribution.  $R_0$  and  $R_{eff}$  were computed via the next generation matrix method [10]. Compared to  $R_0$ ,  $R_{eff}$  simply accounted for background immunity at the start of the epidemic.

**Table S3.** Percentage of individuals assumed vaccinated within each age group cohort in the base case scenario (overall vaccine coverage: 45%)

| Age group        | Vaccine coverage |
|------------------|------------------|
| 6 months–4 years | 68%              |
| 5–17 years       | 59%              |
| 18–49 years      | 38%              |
| 50–64 years      | 54%              |
| 65–74 years      | 75%              |
| ≥75 years        | 75%              |

**Table S4. Influenza vaccine coverage rate (QIVe for all age groups) on ICU and hospital bed usage in a high and low incidence influenza season. COVID-19 values based on the mean peak occupancy values across the three variants assessed**

|                       | Coverage rate | Hospital Visits | Hospital beds used<br>Influenza | ICU beds used<br>Influenza | Hospital beds used<br>Influenza +<br>COVID-19 | ICU beds used<br>Influenza +<br>COVID-19 | Excess<br>hospital<br>beds used<br>Influenza +<br>COVID-19 | Excess ICU<br>beds used<br>Influenza +<br>COVID-19 |
|-----------------------|---------------|-----------------|---------------------------------|----------------------------|-----------------------------------------------|------------------------------------------|------------------------------------------------------------|----------------------------------------------------|
| <b>High incidence</b> | 40%           | 868 021         | 215 104                         | 32 659                     | 326 705                                       | 57 286                                   | 26 705                                                     | 27 286                                             |
|                       | 45%           | 781 861         | 183 778                         | 27 981                     | 295 379                                       | 52 608                                   | -4 621                                                     | 22 608                                             |
|                       | 52%           | 642 626         | 138 701                         | 21 198                     | 250 302                                       | 45 825                                   | -49 698                                                    | 15 825                                             |
|                       | 55%           | 574 884         | 119 177                         | 18 244                     | 230 778                                       | 42 871                                   | -69 222                                                    | 12 871                                             |
|                       | 70%           | 191 566         | 32 110                          | 4 947                      | 143 711                                       | 29 574                                   | -156 289                                                   | -426                                               |
| <b>Low incidence</b>  | 40%           | 431 130         | 82 500                          | 12 665                     | 194 101                                       | 37 292                                   | -105 899                                                   | 7 292                                              |
|                       | 45%           | 324 415         | 57 521                          | 8 850                      | 169 122                                       | 33 477                                   | -130 878                                                   | 3 477                                              |
|                       | 52%           | 167 263         | 27 694                          | 4 268                      | 139 295                                       | 28 895                                   | -160 705                                                   | -1 105                                             |
|                       | 55%           | 118 457         | 19 016                          | 2 932                      | 130 617                                       | 27 559                                   | -169 383                                                   | -2 441                                             |
|                       | 70%           | 13 622          | 1 915                           | 296                        | 113 516                                       | 24 923                                   | -186 484                                                   | -5 077                                             |

**Table S5. Influenza vaccine coverage rate (QIVc for 6 months to 64 years, aQIV for ≥65 years) on ICU and hospital bed usage in a high and low incidence influenza season. COVID-19 values based on the mean peak occupancy values across the three variants assessed**

|                       | Coverage rate | Hospital Visits | Hospital beds used Influenza | ICU beds used Influenza | Hospital beds used Influenza + COVID-19 | ICU beds used Influenza + COVID-19 | Excess hospital beds used Influenza + COVID-19 | Excess ICU beds used Influenza + COVID-19 |
|-----------------------|---------------|-----------------|------------------------------|-------------------------|-----------------------------------------|------------------------------------|------------------------------------------------|-------------------------------------------|
| <b>High incidence</b> | 40%           | 815 709         | 194 534                      | 29 595                  | 306 135                                 | 54 222                             | 6 135                                          | 24 222                                    |
|                       | 45%           | 713 614         | 159 768                      | 24 380                  | 271 369                                 | 49 007                             | -28 631                                        | 19 007                                    |
|                       | 52%           | 545 040         | 110 261                      | 16 894                  | 221 862                                 | 41 521                             | -78 138                                        | 11 521                                    |
|                       | 55%           | 463 055         | 89 385                       | 13 718                  | 200 986                                 | 38 345                             | -99 014                                        | 8 345                                     |
|                       | 70%           | 87 891          | 13 736                       | 2 119                   | 125 337                                 | 26 746                             | -174 663                                       | -3 254                                    |
| <b>Low incidence</b>  | 40%           | 355 669         | 65 090                       | 10 006                  | 176 691                                 | 34 633                             | -123 309                                       | 4 633                                     |
|                       | 45%           | 237 828         | 40 192                       | 6 191                   | 151 793                                 | 30 818                             | -148 207                                       | 818                                       |
|                       | 52%           | 101 811         | 16 082                       | 2 481                   | 127 683                                 | 27 108                             | -172 317                                       | -2 892                                    |
|                       | 55%           | 66 246          | 10 157                       | 1 567                   | 121 758                                 | 26 194                             | -178 242                                       | -3 806                                    |
|                       | 70%           | 6 128           | 804                          | 124                     | 112 405                                 | 24 751                             | -187 595                                       | -5 249                                    |

## References

- [1] Centers for Disease Control and Prevention (CDC). US Flu VE data for 2019-2020. <https://www.cdc.gov/flu/vaccines-work/2019-2020.html>. Accessed 30 June, 2022.
- [2] Boikos C, Fischer L, O'Brien D, Vasey J, Sylvester GC, Mansi JA. Relative Effectiveness of the Cell-derived Inactivated Quadrivalent Influenza Vaccine Versus Egg-derived Inactivated Quadrivalent Influenza Vaccines in Preventing Influenza-related Medical Encounters During the 2018-2019 Influenza Season in the United States. *Clin Infect Dis*. Aug 2 2021;73(3):e692-e698.
- [3] Mannino S, Villa M, Apolone G, et al. Effectiveness of adjuvanted influenza vaccination in elderly subjects in northern Italy. *Am J Epidemiol*. Sep 15 2012;176(6):527-33.
- [4] Baguelin M, Flasche S, Camacho A, Demiris N, Miller E, Edmunds WJ, Assessing Optimal Target Populations for Influenza Vaccination Programmes: An Evidence Synthesis and Modelling Study. *PLoS Med* 2013;10, e1001527.
- [5] Ferguson NM, Cummings DA, Cauchemez S, Fraser C, Riley S, et al. Strategies for containing an emerging influenza pandemic in Southeast Asia. *Nature* 2005;437: 209–214.
- [6] Beumer MC, Koch RM, van Beuningen D, et al. Influenza virus and factors that are associated with ICU admission, pulmonary co-infections and ICU mortality. *J Crit Care*. 2019;50:59-65.
- [7] Lina B, Georges A, Burtseva E, et al. Complicated hospitalization due to influenza: results from the Global Hospital Influenza Network for the 2017-2018 season. *BMC Infect Dis*. 2020;20(1):465
- [8] Powell, M.J.D. 2009. The BOBYQA algorithm for bound constrained optimization without derivatives, Department of Applied Mathematics and Theoretical Physics, Cambridge England, technical report NA2009/06.
- [9] Johnson, SG. The NLOpt nonlinear-optimization package, <https://nlopt.readthedocs.io/en/latest/>

[10] Diekmann O, Heesterbeek JAP, Roberts MG. The construction of next-generation matrices for compartmental epidemic models. *J. R. Soc. Interface.* 2010;7, 873–885.
